# Supplementary material for: Nanoclusters of Cu(ii) supported on nanocrystalline W(vi) oxide: a potential catalyst for single-step conversion of cyclohexane to adipic acid
Source: Royal Society of Chemistry journal article supplement (doi:10.1039/c5gc00379b), 2015-01-01
Supplement: c5gc00379b1.pdf [file c5gc00379b1.pdf]

Electronic Supplementary Information (ESI) †

**Nanoclusters of Cu (II) Supported on Nanocrystalline W (VI)  
Oxide: A Potential Catalyst for Single-Step Conversion of  
Cyclohexane to Adipic Acid**

**Shankha S. Acharyya,<sup>a</sup> Shilpi Ghosh,<sup>a</sup> and Rajaram Bal<sup>a,\*</sup>**

<sup>a</sup>Catalytic Conversion & Processes Division, CSIR-Indian Institute of Petroleum, Dehradun  
248005, India

Corresponding author. Tel.: +91 135 2525917; Fax: +91 135 2660202

E-mail addresses: [raja@iip.res.in](mailto:raja@iip.res.in)

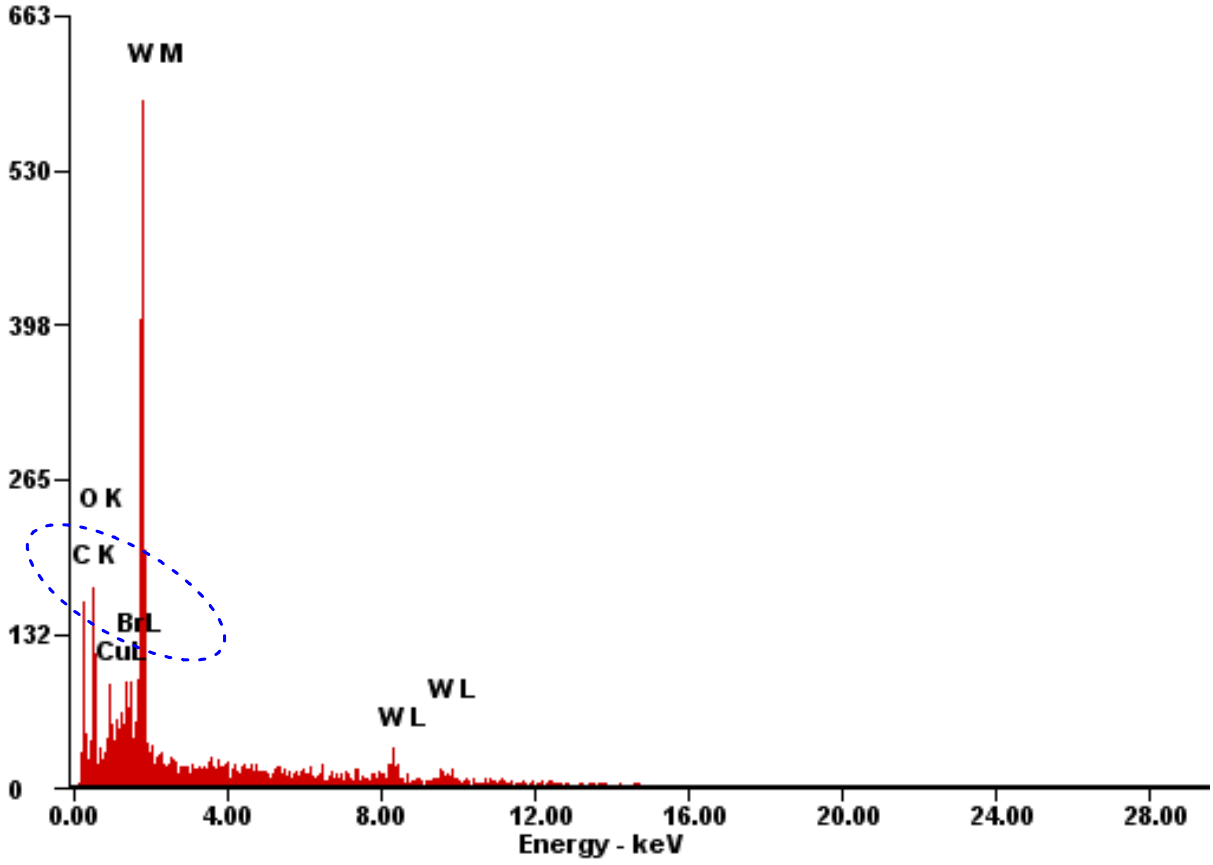

**Fig. S1** SEM-EDX of the uncalcined Cu/WO<sub>3</sub> nanoparticles catalyst.

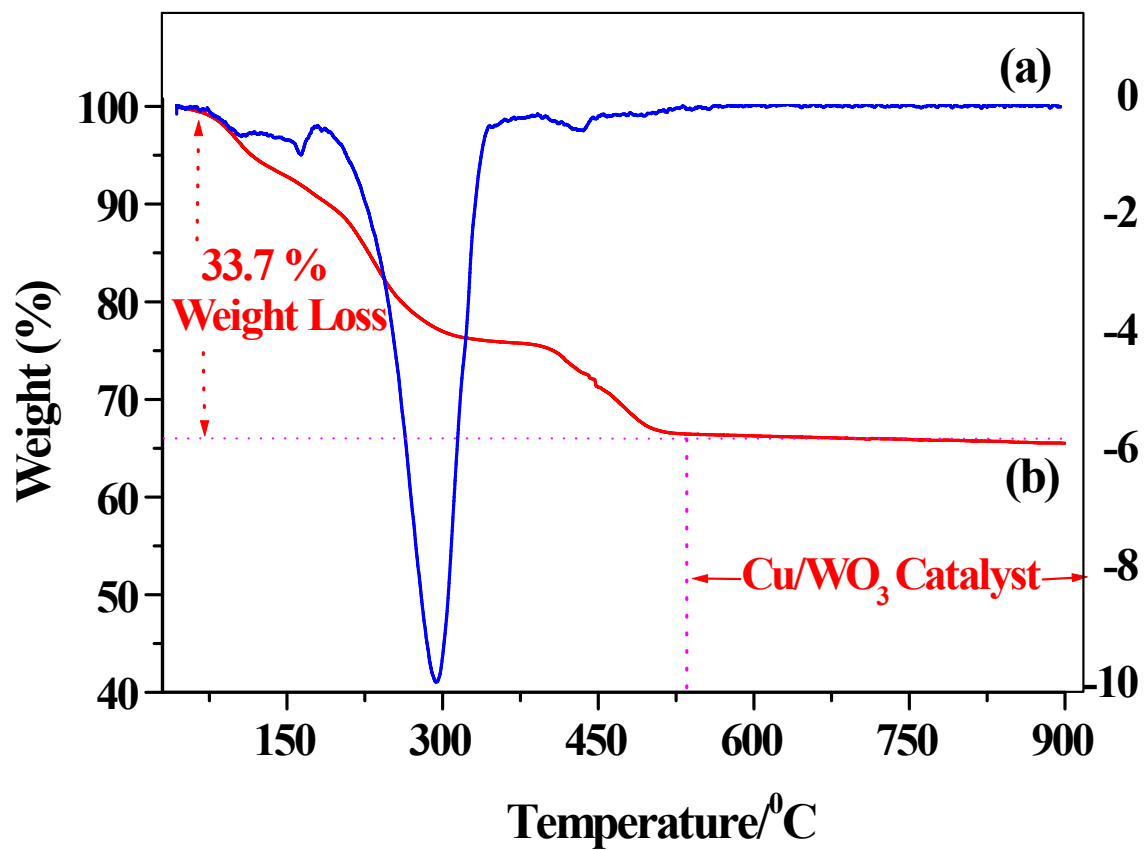

Fig. S2 (a) — DTG and (b) — TGA diagram of uncalcined Cu/WO<sub>3</sub> nanoparticles catalyst.

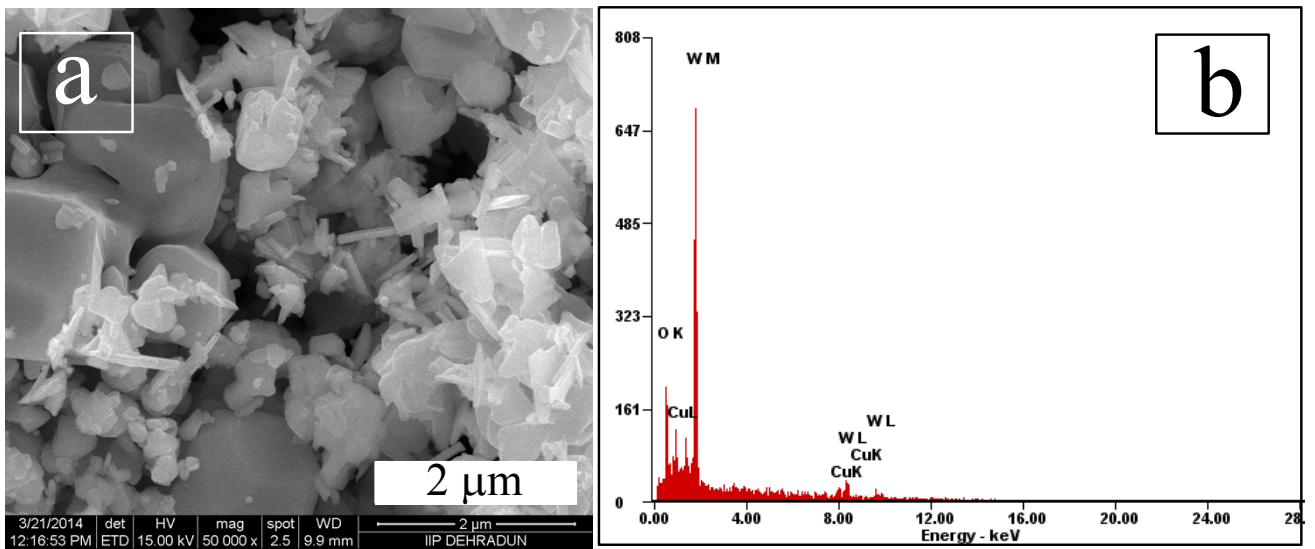

**Fig. S3** (a) SEM image and (b) SEM-EDX image of Cu/WO<sub>3</sub> catalyst where loading of Cu is 5.5 %

**Synthesis of CuO/WO<sub>3</sub> catalyst (CuO-WO<sub>3</sub><sup>IMP</sup>) by impregnation (incipient wetness) method.**

Cupric nitrate [Cu(NO<sub>3</sub>)<sub>2</sub>·3H<sub>2</sub>O], tungsten (III) oxide (commercial), were obtained from Sigma-Aldrich. All these reagents were used as received. Commercial W (VI) oxide was calcined at 540 °C. Then 0.11g Cu(NO<sub>3</sub>)<sub>2</sub>·3H<sub>2</sub>O (taking 3% loading of Cu on WO<sub>3</sub>) was dispersed on 1g support (tungsten oxide), added in 50 ml distilled water by an incipient wetness technique. After impregnation, the catalysts were dried at 110 °C, followed by calcination at 500 °C for 6 h in air.

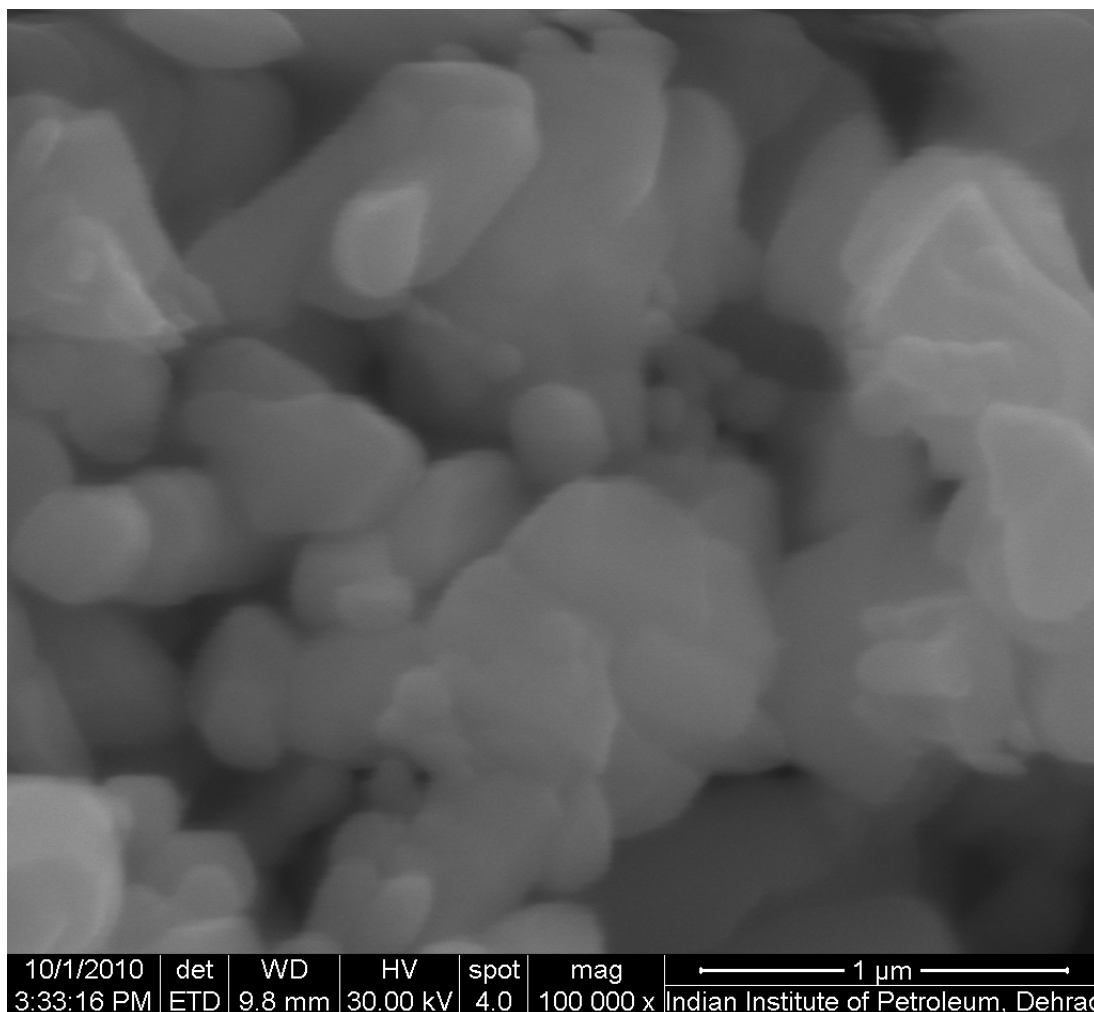

**Fig. S4** SEM image of CuO/WO<sub>3</sub> catalyst (CuO-WO<sub>3</sub><sup>IMP</sup>) by impregnation method.
